# Duck, duck, goose: Benchmark bird surveys help quantify counting errors and bias in a citizen-science database

W. Douglas Robinson<sup>1\*</sup>, Tyler A. Hallman<sup>1</sup>, Rebecca A. Hutchinson<sup>1,2</sup>

<sup>1</sup>Oak Creek Lab of Biology, Department of Fisheries and Wildlife, Oregon State University, Corvallis, Oregon, USA

<sup>2</sup>School of Electrical Engineering and Computer Science, Oregon State University, Corvallis, Oregon, USA

## \* Correspondence:

W. Douglas Robinson

[douglas.robinson@oregonstate.edu](mailto:douglas.robinson@oregonstate.edu)

**Keywords: biodiversity benchmarks, birder behavior, citizen science, eBird, statistical bias, statistical error, wildlife counts**

## Abstract

The growth of biodiversity data sets generated by citizen scientists continues to accelerate. The availability of such data has greatly expanded the scale of questions researchers can address. Yet, error, bias, and noise continue to be serious concerns for analysts, particularly when data being contributed to these giant online data sets are difficult to verify. Counts of birds contributed to eBird, the world's largest biodiversity online database, present a potentially useful resource for tracking trends over time and space in species' abundances. We quantified counting errors in a sample of 1406 eBird checklists by comparing numbers contributed by birders (N=246) who visited a popular birding location in Oregon, USA, with numbers generated by a professional ornithologist engaged in a long-term study creating benchmark (reference) measurements of daily waterbird counts. We focused on waterbirds, which are easily visible at this site. We evaluated potential predictors of count differences, including characteristics of contributed checklists, of each species, and of time of day and year. Count differences were biased toward undercounts, with more than 75% of counts being below the daily benchmark value. When only checklists that actually reported a species known to be present were included, median count errors were -29.1% (range: 0 to -42.8 %; N=20 species). Model sets revealed an important influence of each species' reference count, which varied seasonally as waterbird numbers fluctuated, and of percent of species known to be present each day that were included on each checklist. That is, checklists indicating a more thorough survey of the species richness at the site also had, on average, lower counting errors. However, even on checklists with the most thorough species lists, counts were biased low and exceptionally variable in their accuracy. To improve utility of such bird count data, we suggest three strategies to pursue in the future. One is to assess additional options for analytically determining how to select checklists that have the highest probability of including less biased count data, as well as exploring options for correcting bias during the analysis stage. Another is to add options for users to provide additional information that helps analysts choose checklists, such as an option for users to tag checklists where they focused on obtaining accurate counts. We also recommend exploration of opportunities to effectively calibrate citizen-science bird count data by establishing a formalized network of marquis sites where dedicated observers regularly contribute carefully collected benchmark data.

## Introduction

42 Contributions of volunteers to scientific databases are increasing as the popularity of citizen science  
43 continues to grow (Miller-Rushing et al., 2012; Chandler et al., 2017). Many citizen science projects  
44 are open-access and anyone can contribute observations without required training in best data  
45 collection practices (Cohn, 2008). eBird is an open online database with more than 560,000 users  
46 (eBirders) contributing millions of bird observations annually via checklists (Sullivan et al., 2009).  
47 Each checklist contains a list of bird species identified on a particular date and, ideally, counts of  
48 each species, as well as information on location visited, basic protocol used while birding (traveling,  
49 staying stationary, etc.), and duration of effort (Wood et al., 2011). The huge spatial extent of  
50 presence-absence data in eBird has facilitated efforts to model species distributions across continental  
51 and global spatial scales once data have been filtered to exclude potentially problematic checklists  
52 (Fink et al., 2013). The degree to which the count data may reliably inform scientific and  
53 management objectives remains unclear.

54 Although efforts to quantify issues associated with bird species detection have been studied and  
55 continue to be developed, both in citizen science databases and in structured scientific surveys  
56 (Buckland et al., 2008; Hutto, 2016; Walker and Taylor, 2017), less is known about potential  
57 counting errors and biases leading to noisy data. Counting birds is difficult, even by the most  
58 proficient observers (Robbins and Stallcup, 1981; Robinson et al., 2018). Methods to account for  
59 detection issues in bird counting studies continue to expand with development of new data collection  
60 and analytical methods (Buckland et al., 2008; Barker et al., 2018). Nearly all the methods, however,  
61 require a sophisticated sampling protocol that would exclude most volunteer birder contributions and  
62 therefore limit the advantages of gathering data at massive geographic scales. Yet, the potential  
63 windfall from large quantities of data can quickly be eroded if a lack of structured protocols leads to  
64 data quality concerns (Kelling et al., 2019). Given that abundance is one of the fundamental  
65 influences on population dynamics, functional roles in ecosystems, and even extinction risk (Brown,  
66 1984), a better understanding of the potential value of count data contributed to massive online  
67 databases by untrained volunteers is needed (Greenwood, 2007). For example, species count errors in  
68 eBird data could limit our abilities to observe important abundance trends (Horns et al., 2018).  
69 Effective processes for evaluating and handling such errors need further development, owing to the  
70 potentially huge value of tracking population changes at a continental scale during this era of rapid  
71 environmental change (Bird et al., 2014; Fink et al., 2020).

72 Among the primary concerns are errors, bias and noise. Errors, for our purposes here, are differences  
73 in counts between a reference (benchmark) value and values included in eBird checklists for the same  
74 species on the same date. Errors are comprised of both bias and noise. Bias is the tendency for the  
75 errors to be consistently higher or lower than the reference value. Noise is the additional random  
76 counting error that increases variance of the counts. All three impede efforts to determine true count  
77 values, and are challenges common to many branches of biology (West, 1999; Guillery, 2002). We  
78 acknowledge that labeling such count differences as errors assumes the benchmark values have less  
79 error and doing so risks offending some eBird contributors. Given that reliable benchmarks are  
80 achieved by consistent application of best counting practices, we do consider deviations from the  
81 benchmark values here to be errors, not simply variation among observers. To acknowledge that  
82 there are sources of error in all measurements, however, we often refer to such deviations as count  
83 differences. We consider the terms ‘error’ and ‘count differences’ to be synonymous.

84 Robust comparisons of count differences are improved when data are collected in situations where  
85 detectability challenges are expected to be low. Such situations are rare but uniquely valuable. We  
86 used an extensive data set focused on benchmarking the richness and abundances of birds at a water  
87 treatment site in Oregon, USA. We compared count data gathered by a professional ornithologist

88 focused specifically on creating an accurate benchmark measurement of daily fluctuations in  
89 waterbird counts with counts submitted by birders to eBird. We quantified the magnitude and  
90 directionality of count differences. Our data span 10 years and include 1406 eBird checklists  
91 contributed by 246 observers, as well as 2038 checklists in the benchmark data. The site is well  
92 suited for rigorous comparisons because all waterbirds are in the open, largely tolerant of human  
93 activity, and so provide a best-case scenario for detection, identification, and counting of birds. No  
94 adjustments for detectability or availability issues should be needed because all parts of the ponds are  
95 visible. Thus, discrepancies in counts between a professional observer focused on obtaining accurate  
96 numbers and data reported to eBird should be attributable to counting errors instead of availability  
97 and detectability issues. While there could be very minor detectability issues, like some diving  
98 waterbirds being under water briefly, the vast majority of error in this setting should be attributable to  
99 counting error.

100 We first quantified count differences then sought to understand potential factors explaining the  
101 magnitude and directionality of count differences. We hypothesized that counting errors would be  
102 influenced by traits associated with the species being counted, with an index of observer experience  
103 (percent of species detected), and with seasonal changes in numbers of birds present. For example,  
104 we expected count differences might be slightly greater for diving ducks, which are sometimes  
105 briefly under water while foraging, and lower for dabbling species, which sit in the open  
106 continuously. We expected smaller count differences in checklists that included a higher proportion  
107 of the species present each day. We also hypothesized that count differences would be greater when  
108 overall total number of waterbirds present was high, potentially causing observers to be overwhelmed  
109 and therefore more prone to counting errors. Finally, we explored the possibility that, even if count  
110 data were biased on individual checklists, the waterbird community might be adequately  
111 characterized as a whole by combining count data from multiple observers and checklists. We  
112 conclude by proposing additional approaches that may reveal the extent to which citizen-science bird  
113 count data may be used to estimate abundances reliably.

## 114 **Methods**

### 115 Study Area

116 Bird count data were gathered from 2010 to 2019 at the Philomath Wastewater Treatment facility, in  
117 Philomath, Oregon USA. The site contained two 35-ha ponds until 2011 when two additional 35-ha  
118 ponds were added. Each pond is rectangular and enclosed by a berm with a single-lane road. Birders  
119 circumnavigate the ponds typically by vehicle, rarely by walking or bicycling; WDR drove.  
120 Vegetation does not obscure the view at any pond. All shores are covered by large rocks (riprap).  
121 Birders circle all four ponds during a visit, very rarely restricting visits to fewer ponds. We found that  
122 the distribution of visit durations was unimodal (median = 60 min; Median Average Deviation  
123 (MAD) = 37; skew=1.161; N=1646 checklists) suggesting that birders use similar methods while at  
124 the ponds.

125

### 126 Study species

127

128 We included 20 species we refer to as “waterbirds,” species that swim in the open while on the ponds  
129 and should be easily seen (Table 1). The species are primarily ducks and geese, but also include

130 grebes, American Coot (*Fulica americana*), and gulls. These are species birders identify by sight, not  
131 by sound. We excluded species that occurred primarily as fly-overs, such as Cackling Goose (*Branta*  
132 *hutchinsi*), species whose counts rarely exceeded two per day, and species whose numbers varied  
133 strongly within a day. The number of waterbirds present at the site varied seasonally from a few  
134 dozen during mid-summer (June) to five thousand or more during fall migration (October-  
135 November).

136

137 Benchmark counts

138

139 All birds of all species were counted during each site visit by WDR. We call these our benchmark  
140 counts ( $R^*$ ) and they serve as the reference values against which all other count data are compared.  
141 Waterbird counts were made to plus or minus one individual except for Northern Shoveler (*Spatula*  
142 *clypeata*), which were plus or minus 10 because they forage in constantly moving dense aggregations  
143 rendering more precise counts problematic, and Bufflehead (*Bucephala albeola*), which were counted  
144 to plus or minus 5 because they dive so frequently while foraging in the early morning period  
145 surveyed by WDR that more accurate counts were difficult. Counts were tallied separately for each  
146 pond then aggregated later. In the time frame of these counts, movements between ponds were  
147 normally minimal. Duration of counting time was recorded separately for each pond. To reduce  
148 possible use of WDR's count data by eBirders who wanted to post numbers but may not have  
149 counted on their own, we used three steps to minimize copying of data. First, we imposed a time lag  
150 of one to four weeks between dates of counting and of uploading to eBird the WDR data. Second, we  
151 hid all of WDR's checklists from the eBird public display in Recent Visits and, third, we posted only  
152 the pond-specific data, not the aggregated data. We used aggregated counts from the first visit each  
153 day as  $R^*$  for comparison with counts reported on eBird checklists.

154 On some days ( $N=84$ ), WDR counted birds more than once. These second-visit data, which we call  
155 Ref2 counts, were also complete counts of the study species and averaged 13% shorter in duration,  
156 yet counts were generally similar. They were used to characterize within-day variability in numbers  
157 but provide a conservative estimate of that variability because they were largely conducted on days  
158 with exceptional levels of migratory movements. Thus, they estimate a probable upper bound on the  
159 expected amount of within-day variability in waterbird numbers (averaging 0 to -8%). We also used  
160 these Ref2 data to evaluate of time-of-day effects when comparing WDR counts with data from the  
161 ten observers contributing the most study site data to eBird, because eBirders tended to count birds  
162 later in the day than did WDR. The times of day eBird checklists were initiated as well as the  
163 difference in start times of eBird and benchmark checklists were unimportant in predicting percent  
164 error in our across-species and species-specific model sets. Therefore, we concluded that  
165 comparisons of count differences between  $R^*$  and eBird checklists were appropriate and that possible  
166 time-of-day effects could be ignored.

167

168 eBird checklists

169

170 We downloaded eBird checklists from the Philomath Sewage Ponds eBird hotspot as well as eBirder  
171 personal locations within 1 km from 2010 to 2019. Only data obviously restricted to the ponds were  
172 included. No other waterbird sites are present within 4 km of the site. Most eBirders used the pre-  
173 established hotspot as the checklist location but some created new personal locations each time. We  
174 included eBird checklists following the stationary, traveling, and area protocols. We removed  
175 checklists with greater than ten observers or durations of over five hours. We included only complete  
176 checklists with all birds reported and removed any checklists where observers reported no waterbirds.  
177 From each complete eBird checklist, we collected data on date, start time, observer, duration of  
178 count, identity of waterbird species reported (to allow calculation of percent richness; see below), and  
179 count data for our twenty focal species. When species were recorded as present but not counted (X  
180 noted instead of a number), those data were excluded because no count difference could be  
181 calculated.

182

183 Comparisons of count data

184

185 We restricted our comparisons to dates where WDR counted birds and at least one eBird checklist  
186 was contributed on the same day (N=767 dates). Our questions were about counting differences and  
187 not detection rates of rare species, so we further restricted our comparisons to counts of greater than  
188 three for each species detected on WDR's first visit ( $R^*$ ). We calculated the *Count Difference* for  
189 each species by subtracting  $R^*$  from eBird counts on each checklist. Count differences were positive  
190 when eBird checklists reported higher numbers than  $R^*$  or negative when eBird checklists reported  
191 fewer birds than  $R^*$ . Numeric values of count differences spanned three orders of magnitude, so we  
192 focus on reporting *Percent Error*, which we calculated by converting each difference to a proportion  
193 of  $R^*$ .

194

195

196 Hypothesized predictors of percent error

197

198 To evaluate factors hypothesized to be associated with percent error, we included variables  
199 associated with species, checklists, time of year and observer experience. *Species characteristics*  
200 included categorization as dabbler versus diver, degree to which species form dense aggregations,  
201 and the degree of sexual dimorphism. *Checklist characteristics* included start time, duration and  
202 number of observers. *Time-of-year characteristics* were associated with daily numbers of waterbirds  
203 ( $R^*$ , Ref2 and their sums for all 20 species) and waterbird species richness present at the study site  
204 (measured as the richness detected by the professional [proRichness] as well as the aggregate of  
205 species listed in eBird checklists and proRichness). Because *observer experience* at the site might  
206 also influence counting accuracy, we compared data from the 10 observers who contributed the most  
207 checklists with the  $R^*$  and Ref2 benchmark data. Additional details on each variable are explained  
208 below.

209



## 210 Species characteristics

211 To explore patterns of species-specific variability in count data, we created categorical variables for  
212 species traits that might impact counts (Table 1). We categorized birds as dabblers versus divers.  
213 Dabblers were any species that foraged primarily by swimming on the surface of the water, which  
214 included gulls, American Coot, and *Aix*, *Anas*, *Mareca*, and *Spatula* ducks. Divers foraged below  
215 water regularly and included scoters, grebes, and *Aythya* and *Bucephala* ducks.

216 We also included an index of spatial aggregation on the ponds. Some species, for example Northern  
217 Shoveler, often forage in densely packed groups, creating challenging circumstances to accurately  
218 count birds, while other species forage singly or as spatially-distanced groups where enumeration  
219 should be much easier. The aggregation index was simply a subjective binary classification (0 for  
220 foraging alone or in loose aggregations versus 1 for foraging in aggregations that might render  
221 counting difficult) based on our years of experience at the site.

222 The degree of plumage dimorphism and similarity to other species could influence error and bias in  
223 counts because of species misidentification. We categorized species as those with weak or no obvious  
224 plumage dichromatism during most of the period of time when each species was present (e.g., geese,  
225 coots) versus strong dichromatism (males and females distinctly visually different).

226 To evaluate the possibility that species identification of similar species might influence count  
227 differences, we used another subjective binary category called “Doppelganger;” 1 indicated the  
228 species co-occurred with a similar species whereas 0 indicated the species was unique in appearance  
229 and unlikely to be confused with other species. The categorization may vary seasonally, especially in  
230 late summer when many waterbirds molt to eclipse plumage. Because total waterbird numbers were  
231 low during late summer, we utilized one value for each species.

## 232 Checklist characteristics

233 Daily start time among eBird checklists was highly variable, covering all daylight hours. The mean  
234 start time was 4 hours later than the mean start time for WDR visits. Although we only compared  
235 counts conducted on the same day, we wanted to evaluate potential effects of time-of-day and  
236 temporal lag between the eBird checklist counts and  $R^*$ . To do so, we converted checklist start time  
237 to minutes since midnight then calculated the difference in start time between eBird checklists and  
238 WDR first visits.

239 Because our Ref2 counts occurred later in the day when more eBird checklists were initiated, we  
240 included Ref2 as an “additional observer” in some comparisons to provide an important check on  
241 within-day variability in counts as a possible explanation for count differences between  $R^*$  and eBird  
242 checklists. Because Ref2 counts were generated on days with high levels of migratory movement, we  
243 consider the count differences between  $R^*$  and Ref2 to represent an upper bound on expected levels  
244 of within-day variability in waterbird numbers.

245 Additional factors associated with each checklist could influence count differences. We reasoned that  
246 duration of time spent at the site should be positively related to count accuracy. All complete eBird  
247 checklists are required to have a measurement of event duration.

248 Number of observers might also influence counting accuracy, so we included the reported number of  
249 observers for each eBird checklist. The  $R^*$  and Ref2 counts were made when WDR was alone more  
250 than 99% of all dates.

251

## 252 Time-of-year characteristics

253 Date influences the number of species present as well as the abundances of each species. Both  
254 richness and abundance could influence counting accuracy so we included day of year in our models.  
255 Because we hypothesized that total number of all waterbirds combined may influence counting  
256 accuracy, we included  $R^*$  counts of all 20 study species and the combined daily total of all waterbirds  
257 in our model sets. In that way, we established the baseline numbers of waterbirds known to be  
258 present as a function of date. In calculating total waterbird abundance, we used data limited to the 20  
259 study species and excluded a subset of species known to have high daily variability in counts, such as  
260 geese, which occurred primarily as fly-overs. The other species excluded from our focal group of 20  
261 species were numerically rare. Further, to determine if percent error was influenced by the number of  
262 each particular species as opposed to overall waterbird abundance, we included  $R^*$  of each relevant  
263 species in our model sets.

264 We hypothesized overall waterbird species richness present at the site on a given date may influence  
265 counting accuracy. A higher number of species to identify could reduce focus for achieving accurate  
266 counts, particularly for the more regularly-occurring and common species (e.g., Mallards, Northern  
267 Shovelers). Therefore, we included in our models the total waterbird richness detected by WDR each  
268 day. Our analyses indicated that richness observed by WDR and total waterbird richness detected by  
269 all eBird contributors were highly correlated. We calculated daily *Percent Richness* based on the 35  
270 possible waterbird species at the site and included that richness in our models (see Supplemental Text  
271 for a list of species). The other 15 species that formed our set of 35 waterbird species included: Snow  
272 Goose (*Anser caerulescens*), Greater White-fronted Goose (*Anser albifrons*), Cackling Goose  
273 (*Branta hutchinsii*), Canada Goose (*Branta canadensis*), Blue-winged Teal (*Spatula discors*),  
274 Eurasian Wigeon (*Mareca penelope*), Redhead (*Aythya americana*), Tufted Duck (*Aythya fuligula*),  
275 Greater Scaup (*Aythya marila*), White-winged Scoter (*Melanitta deglandi*), Black Scoter (*Melanitta*  
276 *americana*), Long-tailed Duck (*Clangula hyemalis*), Common Goldeneye (*Bucephala clangula*),  
277 Barrow's Goldeneye (*Bucephala islandica*), and Common Merganser (*Mergus merganser*).

278

## 279 Observer experience

280

281 Observer experience at the site could also be influential, so we compared percent error in counts from  
282 the ten observers contributing the most eBird checklists at our study site with the  $R^*$  and Ref2 counts.

283

## 284 Data analyses

285

286 We used the “lmer” package in R (R Core Team, 2020) to run mixed-effects models. Our  
287 overarching goal was to identify factors informative for explaining variation in *Percent Error*, our  
288 dependent variable in all models. We included observer ID and species as random effects to account  
289 for observer- and species-specific error when appropriate. We included four categorical species

290 characteristics as fixed effects in our model sets: Dabbler or Diver; Sexually Dichromatic or not;  
291 Doppelganger or not; and Aggregated or not. Five checklist-related characteristics were included as  
292 fixed effects: start time (minutes since midnight), difference in start time between WDR's first count  
293 of a day and each eBird checklist, duration (minutes), number of observers, and day of year. Four  
294 fixed-effects related to time-of-year were also included:  $R^*$  (WDR's reference count of each species,  
295 which varied seasonally), waterbird abundance (aggregated across all species), total waterbird species  
296 richness and percent richness, our index of observer skill at species identification. We included  
297 models with the quadratic effects of species-specific abundance, waterbird abundance, waterbird  
298 richness, duration, number of observers, day of year, and percent richness to examine potential  
299 nonlinear shapes of their effects.

300 Before running mixed effects models, we scaled and centered all numeric variables. We assessed  
301 model performance through BIC and propagated best-performing shapes for each variable to multi-  
302 variable models. We used a forward stepwise approach and added additional potentially influential  
303 variables to the best-performing model until a stable (i.e., model remained the top model after the  
304 inclusion of additional variables) top-performing BIC model was identified.

305 Although *count difference* was normally distributed, *percent error* was not. Non-detections of species  
306 that were detected by WDR (eBird counts of zero) equal negative 100 *percent error*. Non-detections  
307 caused a bimodal distribution of *percent error* with a second peak at negative 100 percent. We  
308 removed non-detections to create a unimodal distribution of percent error. When non-detections were  
309 removed, *percent error* was heavily right-skewed due to the high number of negative *percent errors*  
310 and the few very large positive *percent errors*. To adjust skew, we added a constant to make all  
311 values positive and log (base 10) transformed percent error. In addition to adjusting skew, removal of  
312 non-detections improved the focus of our analyses on count errors, reducing chances that inclusion of  
313 zero counts of species might actually be species detection or identification problems instead of  
314 counting errors. Our restriction of counting error analyses to species detected in numbers of 3 or  
315 greater probably limited most effects of zero counts. In this paper we focus on analyses of data  
316 excluding non-detections but report some analyses in supplemental materials to show the effects of  
317 including non-detections (zero counts) on results. It is possible that an unknown number of zero  
318 counts were a result of reporting errors (data entry mistakes), but we assume this type of error is  
319 relatively rare.

320

### 321 Species-specific model sets

322

323 To understand the (in)consistency of variables influencing species-specific percent error, we ran  
324 standardized linear model sets of the effects of the explanatory variables described above on  
325 *transformed percent error* for each species. As above, we included models with quadratic effects of  
326 species abundance, waterbird abundance, waterbird richness, duration, number of observers, day of  
327 year, and percent richness. As each model set was species-specific, we excluded variables of species  
328 characteristics from these model sets. We included observer ID as an explanatory variable to examine  
329 its comparative influence. In these standardized model sets, we included separate models of the main  
330 effect of each variable and propagated the best shape for each variable into more complex models.  
331 Since start time and difference in start time were highly correlated, we use the top-performing of the  
332 two in subsequent models. We used a forward step-wise approach to determine the top-performing



333 model of checklist covariates. We then ran models with pairs of all non-checklist explanatory  
334 variables with and without the variables in the top checklist covariate model. We used BIC to  
335 compare model performance and select top models.

336

### 337 Non-metric Multidimensional Scaling (NMDS)

338

339 To compare the overall communities described in eBird checklists, we conducted ordination in  
340 species space with NMDS on count data. We grouped checklists by observers to simplify the  
341 analysis. To visualize differences in community characterization, we chose to contrast January and  
342 October because January represents a time of year when waterbird migration is minimal and so daily  
343 numbers are relatively stable, whereas migration is at its peak during October, so richness is high and  
344 volatility in numbers can be high. To evaluate how characterization of waterbird abundance at these  
345 times varied with respect to eBirder checklists, we first removed all checklists that included an “X”  
346 for the count of any of our 20 study species. We then calculated the mean and median values of  
347 species counts across checklists for each observer during each month. To evaluate the idea that group  
348 collective contributions of multiple eBird checklists might characterize the waterbird community  
349 more similarly to  $R^*$ , we calculated mean counts of species across observers in January and October  
350 to create combined count values, which we call the Borg number ( $\bar{B}$ ). We similarly aggregated  
351 WDR’s first-visit species counts as a Reference community. To ensure that our  $\bar{B}$  NMDS positions in  
352 species space were not driven overwhelmingly by an eBirder with the largest number of checklists,  
353 we reran the NMDS without checklists from the top-contributing observer included in  $\bar{B}$ . We used  
354 two dimensions and a maximum of 20 iterations to run NMDS with the “vegan” package in R  
355 (version 3.6.1).

356

357

## 358 **Results**

359

360 We compared benchmark counts of waterbirds from WDR ( $R^*$ ) and at least one eBirder on 672 dates,  
361 representing a total of 1406 comparisons (checklists). eBird checklist contributions varied seasonally  
362 with lows during winter and summer and highs during migration periods (Supplemental Figure 1).  
363 Our analyses included 246 different eBirders who contributed from 1 to 321 checklists.

364

### 365 Percent error

366 Across all twenty species, 76 percent of all counts fell short of  $R^*$  (Figure 1, Supplemental Figure 2),  
367 indicating that count data in eBird checklists regularly contained apparent counting errors. eBird  
368 checklists with species non-detections excluded (that is, no counts of zero included, even if the  
369 species was known to be present that day) had counts below  $R^*$  values by a median of 29.1% but  
370 errors were quite variable across species (Figure 1a), with median absolute deviations of *percent*

371 *error* averaging 44.6% (Supplemental Table 1). At the extremes, count differences across waterbird  
372 species ranged from negative 99% for severe under-counts to more than 3788% too large. In real  
373 numbers, counting differences ranged from being too low by 1443 to too high by 1048 (both for  
374 Northern Shoveler; Figure 1b). Median percent error was negative, indicative of undercounting, for  
375 all waterbird species except the uncommon Surf Scoter (0%;  $R^*$  was always less than 11).

376 Percent error, when averaged across species and all observers, was fairly consistent at 30% when  
377 counts were 30 or greater. Below thirty, counts were more accurate, being closest to zero error when  
378 counts were of 8-10 birds (Figure 2A). Percent error was related to the percent richness (our index of  
379 observer skill where higher percentages indicated an observer included more of the species known to  
380 be present that day on their checklists) in a curvilinear fashion. Checklists including the lowest  
381 richness tended to overcount (Figure 2B). Those including 50% of the expected species undercounted  
382 by 50% on average, while checklists including 90% or more of the species reported on  $R^*$  checklists  
383 averaged errors of 15% or less in count.

384

#### 385 BIC Top models

386 In our multi-species mixed-effects model set, our top model garnered 70 percent of the model weight  
387 and was over four BIC from the next most competitive model (Table 2). Our BIC top model  
388 indicated that a quadratic effect of  $R^*$  and a linear effect of percent richness best explained variation  
389 in percent error.

390 Seasonality in bird numbers was also captured when the second-order  $R^*$  was included as the most  
391 informative variable predicting *percent error*. Numbers of all species varied considerably across each  
392 year (Figure 3). Likewise, total waterbird abundance varied several-fold from its nadir in June to a  
393 maximum in October and November (Supplemental Figure 3). Yet, total waterbird abundance was  
394 rarely an informative variable in our model sets. Only in counts of American Coot did it appear in the  
395 most parsimonious models (in combination with percent richness). In California Gull, waterbird  
396 abundance appeared as an informative variable but only in a weakly competitive model (19% of the  
397 model weight).

398 Within the species-specific model sets, the combination of  $R^*$  and percent richness carried most of  
399 the model weight (mean=0.83, SD=0.18) in 13 of our 18 non-gull species (Supplemental Table 2).  
400 For gulls, top models struggled to outcompete the null. Altogether,  $R^*$  and/or percent richness were  
401 in the top model sets for 17 of 18 non-gull waterbirds.

402

#### 403 Associations with bird characteristics

404 Within our full model, bird characteristics were rarely influential on percent error (Table 2).  
405 Similarly, species-specific models rarely discovered bird traits to be informative variables  
406 (Supplemental Table 2).

407

#### 408 Observer effects

409 Our models often identified percent richness as an influential variable on percent error, so we related  
410 percent richness to percent error as means across all checklists contributed by each observer (Figure  
411 4a). The two were positively related, yet only six of the 246 observers averaged *percent errors* of less  
412 than 10%. The range in percent error for observers detecting 90% or more of waterbird species was  
413 actually greater than the range for observers who detected less than 60% of species, indicating that  
414 percent error alone is an unreliable predictor of counting accuracy. The relationship was not  
415 necessarily driven by site experience because four of the six observers with the most accurate counts  
416 were contributing very few checklists (Figure 4b).

417 We then selected checklists from the ten observers who contributed the most. Those checklists also  
418 showed evidence of undercounting. In nearly all 20 species, percent error was 10 to 60% greater than  
419 even the Ref2 counts (Figure 5). Percent error was highly variable across species. In some species,  
420 such as American Coot, three of the 10 observers reported counts averaging very near the Ref2  
421 counts, whereas in others, such as Pied-billed Grebe, all observers undercounted by at least an  
422 average of 20%. Again, percent error was highly variable in all species even when median percent  
423 error did not deviate far from zero.

424

## 425 Community visualization

426 We visualized characterization of the richness and abundance of the daily waterbird community with  
427 NMDS through ordination of checklists (grouped by observer) in species space. Observers  
428 characterizing the community and its species abundance patterns similarly to  $R^*$  fell nearer to  $R^*$   
429 whereas those positioned increasingly further from  $R^*$  described the community in increasingly  
430 dissimilar details. In both January (Figure 6a) and October (Figure 6b) high inter-observer variability  
431 in how their checklists characterized the waterbird community led to a general lack of clustering near  
432  $R^*$ . In both months, observers reporting more species, contributing more checklists, and surveying  
433 for more time tended to group nearer  $R^*$ . The collective average,  $\bar{B}$ , was nearer  $R^*$  than any  
434 individual observer during January but one observer was closely positioned near  $\bar{B}$  during October.  
435 Removal of checklists from the observer contributing the most data had minimal effects on results.

436

437

## 438 Discussion

439 Benchmark data are often designed to understand temporal change in biodiversity (Curtis and  
440 Robinson, 2015; Curtis et al., 2016; Robinson and Curtis, 2020). Here, we show that they can also be  
441 used to establish standards that aid in quantification of potential errors in citizen-science data.  
442 Through comparisons with such a standard, we discovered that bird count data contributed to eBird  
443 from our study site were consistently biased toward undercounting. Counts averaged approximately  
444 30% too low whenever benchmark counts were of 30 or more birds. Importantly, however, errors  
445 exhibited high variability across species and observers. Benchmark data like ours can subsequently  
446 inform decisions regarding what subsets of data should be selected to most rigorously address  
447 particular scientific questions or management decisions, analogous to how checklist calibration  
448 indices help researchers choose suitable eBird checklists based on site- and time-specific  
449 expectations of species richness (Yu et al., 2010; Kelling et al., 2015; Johnston et al., 2018). Yet,

450 situations in which such informative standards may be developed and compared appear to be rare  
451 currently.

452 Our study site presented a unique opportunity to compare bird count data contributed to a citizen  
453 science database (eBird) with benchmark reference data collected by a professional observer focused  
454 on generating accurate daily counts. Characteristics of the site, where all birds were in the open and  
455 identified by sight, minimized issues of availability and therefore the need for detectability  
456 adjustments to compare counts. Data were contributed by 246 observers and included 676 dates  
457 across 10 years, providing an unusual opportunity to explore patterns and potential sources of error.  
458 Although the extent to which our results may be generalized to other sites remains unclear given the  
459 rarity of opportunities like this one, the situation probably represents a best-case scenario given that  
460 birds were in the open and easy to observe. Despite the advantages, count differences in 20 species of  
461 waterbird were highly variable across the calendar year, species, and observer. Coefficients of  
462 variation were high, averaging 6.6 across the 20 species and ranging from 1 to 35.6. For comparison,  
463 in an experimental study of observer counting errors of singing birds, which should have been much  
464 harder to detect and identify but had a lower range of abundances than our waterbird community,  
465 coefficients of variation averaged 0.1 (Bart, 1985).

466 Our quantification of counting error is actually conservative because we excluded counts of zero on  
467 eBird checklists, even for species known to be present. We did so to minimize the potential confound  
468 of misidentifications and reporting errors (failing to enter a count for a species that was actually  
469 observed) from our analysis of counting errors. Yet, it is possible that some fraction of 100%  
470 undercounts were indeed counting errors in the sense that the species was one that observers were  
471 knowledgeable enough to identify but failed to count or report. The median percent error across the  
472 20 species was -48.6 plus or minus 50.9% (MAD) when zero counts were included versus -29.1 plus  
473 or minus 44.6% when zero counts were excluded. Inclusion of zero counts, therefore, has a large  
474 influence on the median, but percent errors were highly variable regardless.

475 Our top overall mixed-effects model carried nearly 70% of the model weight and contained only two  
476 variables. The species-specific  $R^*$  count as a quadratic, which captured the seasonality in numbers  
477 present at the site, was the most informative variable when combined with a linear effect of percent  
478 richness. The inclusion of  $R^*$  indicates that eBird count data were related to the benchmark numbers  
479 but that other factors were also influential. Checklists with a more complete list of the species known  
480 to be present each day had lower counting errors. Yet, checklists including 100% of expected species  
481 still undercounted by an average of 15%. Count differences on checklists from the ten observers who  
482 most often visited the site were still exhibiting undercounts even compared to the Ref2 values, which  
483 were benchmark counts made later each day during weeks with high levels of migratory movements.

484 We documented strong directional bias toward undercounts and also a smaller percentage of large  
485 overcounts, leading to inconsistent patterns in count differences across species. Our comparisons  
486 revealed that undercounting was pervasive, yet very large numbers of a species being present  
487 sometimes led to severe overcounting as well. Interestingly, the influence of number of birds  
488 appeared to be species-specific. The total number of waterbirds of all species present on a given day  
489 was not an influential variable in our overall model explaining percent error, except for one species,  
490 American Coot. This pattern suggests that count differences were unlikely to have been caused by  
491 observers being overwhelmed by the total number of birds to observe, identify and count. Instead, it  
492 appears that each species presented different challenges to observers. Given that our models rarely  
493 identified species' traits as being informative, it remains unclear what species-specific factors are  
494 responsible.

495 The degree of variability across species in count differences should influence potential decisions  
496 regarding use of eBird count data. Our analyses clearly reveal that off-the-shelf acceptance of count  
497 data for assessments of absolute abundance should be done with great care and thoughtfulness. In  
498 addition, if researchers wish to avoid focus on absolute abundance by instead evaluating relative  
499 abundance, our results suggest further caution is warranted. We found great interspecific variability  
500 in count differences. That is, although bias was nearly uniformly directional toward undercounting,  
501 the magnitude of undercounts varied substantially across species indicating that processes generating  
502 errors are inequivalent across species. Therefore, judging differences in one species' abundance  
503 relative to others requires careful thought. If explorations of relative abundance are focused on  
504 within-species changes across sites, care is also warranted because we found substantial differences  
505 among observers in count accuracy. If different sites have different observers, then error/bias  
506 processes will be expected to be different as well. Effective use of relative abundance data depends  
507 on assumptions of consistent errors across species and sites, which appears to be largely untrue in our  
508 data. Further exploration of techniques to determine the degree to which assumptions of similar  
509 counting errors across species might be relaxed to preserve the utility of relative abundance analyses  
510 are warranted. The use of abundance categories could be explored to maximize the information  
511 content gleaned from count data.

512 What role might species misidentifications have played in counting errors? Count differences were  
513 regularly so large that we conclude species misidentification was unlikely to be an important factor.  
514 Probably the most challenging identifications involved female or eclipse-plumaged ducks, which  
515 observers might ignore and exclude from checklists if identification is uncertain. We consider such  
516 omissions to be unlikely for at least three reasons. First, degree of dichromatism was uninformative  
517 in our models explaining percent error. Second, assuming that females represent approximately half  
518 of each species present during most months of a year, count differences might be expected to average  
519 50% if males were counted accurately but females were not. Instead, percent error varied widely  
520 across species. Finally, count differences of monochromatic versus dichromatic species were not  
521 obviously different. However, it is possible that observers were more accurate for some species than  
522 others because of paying greater attention to unusual or favorite species (Schuetz and Johnston,  
523 2019). At our site, most charismatic species of great interest to birders are rarities and so were not  
524 included in our analyses. Counts of Surf Scoter, a species that occurs during a narrow window of  
525 time in fall, were generally accurate, but we cannot attribute the accuracy to celebrity alone given its  
526 occurrence in such small numbers.

527 Based on our analyses of count differences at this site, it appears that count data on eBird checklists  
528 from similar situations should be used with great care and thoughtfulness. Aside from a  
529 predominantly directional bias toward undercounts, we found few consistent species-specific patterns  
530 in percent error. Errors differed in magnitude across species, observers, and time of year. Therefore,  
531 development of some type of calibration effort, where checklist numbers are adjusted to more closely  
532 approximate species-specific abundances poses an interesting challenge. The variability in raw count  
533 data suggests that tracking trends across time without additional steps to filter data or analytically  
534 adjust for noise could be especially problematic. Depending on the particular scientific question of  
535 interest, needs for precision might decline, so other analytic approaches could be implemented. For  
536 example, if abundances can be binned into categories and approaches such as ordinal or quantile  
537 regression used (Ananth and Kleinbaum, 1997; Koenker and Hallock, 2001; Howard et al., 2014),  
538 less precisely defined trends over time might be identified. Furthermore, our observation that percent  
539 richness, which we assume to be a correlate of observer experience, was often an informative  
540 variable, suggests that additional exploration of count calibration approaches for data contributed by  
541 the most experienced observers might be informative.



542 If questions about patterns in abundances among species in the waterbird community are of interest,  
543 our NMDS ordination results suggest that combining checklists across multiple observers may  
544 produce results closer to those generated by professional benchmark data. The vectors in NMDS  
545 results may also inform decisions about which criteria to use when filtering data to maximize  
546 inclusion of checklists with the greatest value for specific scientific questions. For example, the  
547 waterbird community at our site was better characterized by observers who included more species on  
548 their checklists, invested more time searching the site each time, and contributed more checklists  
549 overall. Although species-specific numbers remained inconsistently related to the  $R^*$  counts, the level  
550 of general characterization of the entire community was improved. In a detailed comparison of eBird  
551 data with structured survey results near Sydney, Australia, overall characterization of the bird  
552 communities was similar as well, but the collectively greater effort expended by eBirders resulted in  
553 discovery of a greater number of uncommon species (Callaghan et al., 2018).

554 Determining the extent to which results from our site and observers may be generalized more widely  
555 will require identification of other sites with benchmark data sets. We also recommend further  
556 investigation of approaches for identifying checklists with higher probability of having the most  
557 accurate count data. New approaches for categorizing checklists based on expected numbers of  
558 species have recently been developed but it remains unclear if these same criteria also apply to bird  
559 counting accuracy (Callaghan et al., 2018). Our index of checklist quality was based solely on the  
560 percent of species reported on checklists that were also detected that day by the professional  
561 observer. Percent richness was regularly in top models, so does have explanatory influence on count  
562 differences. Yet, direct comparisons of data from those observers and the  $R^*$  and Ref2 numbers still  
563 showed substantial differences, primarily of undercounting.

564 If a sufficiently detailed benchmark data set is available, however, adjustments for seasonal  
565 fluctuations in numbers of each species could conceivably be implemented. Such calibrations might  
566 be conducted more effectively if individual observers exhibited consistency in counting errors, an  
567 issue we have not explored here. It is unknown if observers improve their counting skills over time in  
568 the same way that observers are expected to improve abilities to detect species or if temporal  
569 stochasticity drives counting errors. A goal could be to develop a count calibration metric for each  
570 observer so that it can be extended and applied to counts from sites lacking data from a professional  
571 observer if those sites are likely to have similar species composition and relative abundances.  
572 However, given the high level of variability in count data we quantified across observers, species and  
573 time, such calibration metrics may be quite challenging to develop. Complex models such as the  
574 Bayesian hierarchical models using Markov chain Monte Carlo approaches like those implemented  
575 with Christmas Bird Count data (Link et al., 2006), might be helpful in the absence of additional  
576 information on checklist accuracy and reliability. Our community ordination results suggested that  
577 combining data across multiple checklists from multiple observers (the group collective effort) might  
578 more closely approximate the community characterization than most single contributors did. Further  
579 exploration of similar approaches and sensitivities to checklist characteristics could identify  
580 necessary checklist quality criteria that must be met prior to use in such analyses. In the end, use of  
581 any checklist count data will be influenced strongly by each project's specific objectives (Isaac and  
582 Pocock, 2015).

583 We hypothesize that the high variability in species count information on eBird checklists could be  
584 influenced by common aspects of birder behavior. Prior to the advent of eBird, most birders, in North  
585 America at least, focused their efforts on listing species and watching behavior (Eubanks, Jr. et al.,  
586 2004). Intentional counting was done by a small percentage of particularly avid observers, while  
587 most others only counted during organized activities such as Christmas Bird Counts (Boxall and

588 McFarlane, 1993). A much smaller percentage contributed count data to scientific projects with  
589 structured protocols such as the North American Breeding Bird Survey. eBird has revolutionized the  
590 degree of attention birders pay to numbers of birds around them (Wood et al., 2011). It has pushed  
591 birders to value data beyond the day's species list. The novelty of this effort to count all birds every  
592 time one goes birding, may contribute to the variability in quality of the count data. Contributors are  
593 largely untrained about best practices for counting, especially when birds are present in large  
594 numbers, flying, or inconspicuous because they are secretive or available only by sound. We  
595 encourage development of additional training opportunities for eBird contributors that improve their  
596 knowledge of the value of accurate count data as well as their counting skills. Training improves data  
597 quality even for professional observers (Kepler and Scott, 1981).

598 An indication on checklists in the eBird database that such training had been accomplished might  
599 facilitate selection of checklists by researchers who wish to use count data only from trained  
600 observers. Furthermore, the addition of a qualitative categorization of counting accuracy for each  
601 checklist, designated by the observer at time of checklist submission to eBird, might be useful.  
602 Currently, users may code species using presence-absence information instead of counts or select a  
603 checklist protocol (incidental) indicating that not all species detected were included the list. A count  
604 accuracy designation could allow observers to rate their own level of confidence in the accuracy of  
605 their counts or the level of attention they paid to counting accurately, which could serve as additional  
606 criteria by which researchers might choose checklists for their particular scientific question. Given  
607 that many contributors may not necessarily participate to contribute data useful for abundance  
608 analyses but have a variety of other motivations (Boakes et al., 2016), allowing observers to  
609 categorize quickly and easily their personal confidence in their count data would be useful.

610 Finally, exploration of the sources of variation in count data needs additional attention (Dickinson et  
611 al., 2010). The potential value of the vast quantities of information from citizen science databases is  
612 great. Such data have the potential to be effective at informing conservation and management  
613 decisions (McKinley et al., 2017; Young et al., 2019), but a thorough understanding of sources of  
614 error should be a priority before their use (Lewandowski and Specht, 2015). An additional strategy  
615 that may contribute to refinement of information on count data quality in citizen science databases  
616 could be development of a network of sites with trained counters. These marquis sites could be  
617 chosen to represent major habitat types where citizen science data are often gathered or where  
618 researchers specifically need high-quality information. Creating a network of high-quality benchmark  
619 sites would have the added advantage of leaving a legacy of more reliable abundance data for future  
620 generations, especially if complete metadata are also preserved.

621

## 622 **Acknowledgements**

623 WDR and TAH were supported by the Bob and Phyllis Mace Professorship and the College of  
624 Agricultural Sciences. RAH was supported by NSF Grant 1910118. We thank the many birders who  
625 contributed their data to eBird and the many scientists who created, maintain and continue to improve  
626 eBird. Dennis Lewis and Philomath Public Works permitted access to the site, not only to us but to  
627 more than 250 birders. We thank our Reconfiguration Grant Group for helpful discussions.

628

629

630 **Literature Cited**

631

632 Ananth, C. V., and Kleinbaum, D. G. (1997). Regression models for ordinal responses: a review of  
633 methods and applications. *Int J Epidemiol* 26, 1323–1333. doi:10.1093/ije/26.6.1323.

634 Barker, R. J., Schofield, M. R., Link, W. A., and Sauer, J. R. (2018). On the reliability of N-mixture  
635 models for count data. *Biometrics* 74, 369–377. doi:10.1111/biom.12734.

636 Bart, J. (1985). Causes of recording errors in singing bird surveys. *The Wilson Bulletin*, 161–172.

637 Bird, T. J., Bates, A. E., Lefcheck, J. S., Hill, N. A., Thomson, R. J., Edgar, G. J., et al. (2014).  
638 Statistical solutions for error and bias in global citizen science datasets. *Biological*  
639 *Conservation* 173, 144–154. doi:10.1016/j.biocon.2013.07.037.

640 Boakes, E. H., Gliozzo, G., Seymour, V., Harvey, M., Smith, C., Roy, D. B., et al. (2016). Patterns of  
641 contribution to citizen science biodiversity projects increase understanding of volunteers'  
642 recording behaviour. *Scientific reports* 6, 33051.

643 Boxall, P. C., and McFarlane, B. L. (1993). Human Dimensions of Christmas Bird Counts:  
644 Implications for Nonconsumptive Wildlife Recreation Programs. *Wildlife Society Bulletin*  
645 *(1973-2006)* 21, 390–396.

646 Brown, J. H. (1984). On the Relationship between Abundance and Distribution of Species. *The*  
647 *American Naturalist* 124, 255–279. doi:10.1086/284267.

648 Buckland, S. T., Marsden, S. J., and Green, R. E. (2008). Estimating bird abundance: making  
649 methods work. *Bird Conservation International* 18, S91–S108.  
650 doi:10.1017/S0959270908000294.

651 Callaghan, C. T., Martin, J. M., Major, R. E., and Kingsford, R. T. (2018). Avian monitoring –  
652 comparing structured and unstructured citizen science. *Wildl. Res.* 45, 176–184.  
653 doi:10.1071/WR17141.

654 Chandler, M., See, L., Copas, K., Bonde, A. M., López, B. C., Danielsen, F., et al. (2017).  
655 Contribution of citizen science towards international biodiversity monitoring. *Biological*  
656 *Conservation* 213, 280–294.

657 Cohn, J. P. (2008). Citizen Science: Can Volunteers Do Real Research? *BioScience* 58, 192–197.  
658 doi:10.1641/B580303.

659 Curtis, J. R., and Robinson, W. D. (2015). Sixty years of change in avian communities of the Pacific  
660 Northwest. *PeerJ* 3, e1152. doi:10.7717/peerj.1152.

661 Curtis, J. R., Robinson, W. D., and McCune, B. (2016). Time trumps habitat in the dynamics of an  
662 avian community. *Ecosphere* 7, e01575. doi:10.1002/ecs2.1575.

663 Dickinson, J. L., Zuckerberg, B., and Bonter, D. N. (2010). Citizen Science as an Ecological  
664 Research Tool: Challenges and Benefits. *Annual Review of Ecology, Evolution, and*  
665 *Systematics* 41, 149–172. doi:10.1146/annurev-ecolsys-102209-144636.

- 666 Eubanks, Jr., T. L., Stoll, J. R., and Ditton, R. B. (2004). Understanding the Diversity of Eight Birder  
667 Sub-populations: Socio-demographic Characteristics, Motivations, Expenditures and Net  
668 Benefits. *Journal of Ecotourism* 3, 151–172. doi:10.1080/14664200508668430.
- 669 Fink, D., Auer, T., Johnston, A., Ruiz-Gutierrez, V., Hochachka, W. M., and Kelling, S. (2020).  
670 Modeling avian full annual cycle distribution and population trends with citizen science data.  
671 *Ecological Applications* 30, e02056. doi:10.1002/eap.2056.
- 672 Fink, D., Damoulas, T., and Dave, J. (2013). Adaptive Spatio-Temporal Exploratory Models:  
673 Hemisphere-wide species distributions from massively crowdsourced eBird data. in *Twenty-*  
674 *Seventh AAAI Conference on Artificial Intelligence* Available at:  
675 <https://www.aaai.org/ocs/index.php/AAAI/AAAI13/paper/view/6417> [Accessed May 21,  
676 2020].
- 677 Greenwood, J. J. D. (2007). Citizens, science and bird conservation. *J Ornithol* 148, 77–124.  
678 doi:10.1007/s10336-007-0239-9.
- 679 Guillery, R. W. (2002). On counting and counting errors. *Journal of Comparative Neurology* 447, 1–  
680 7. doi:10.1002/cne.10221.
- 681 Horns, J. J., Adler, F. R., and Şekerciöğlü, Ç. H. (2018). Using opportunistic citizen science data to  
682 estimate avian population trends. *Biological Conservation* 221, 151–159.  
683 doi:10.1016/j.biocon.2018.02.027.
- 684 Howard, C., Stephens, P. A., Pearce-Higgins, J. W., Gregory, R. D., and Willis, S. G. (2014).  
685 Improving species distribution models: the value of data on abundance. *Methods in Ecology*  
686 *and Evolution* 5, 506–513. doi:10.1111/2041-210X.12184.
- 687 Hutto, R. L. (2016). Should scientists be required to use a model-based solution to adjust for possible  
688 distance-based detectability bias? *Ecological Applications* 26, 1287–1294.  
689 doi:10.1002/eap.1385.
- 690 Isaac, N. J. B., and Pocock, M. J. O. (2015). Bias and information in biological records. *Biol J Linn*  
691 *Soc* 115, 522–531. doi:10.1111/bij.12532.
- 692 Johnston, A., Fink, D., Hochachka, W. M., and Kelling, S. (2018). Estimates of observer expertise  
693 improve species distributions from citizen science data. *Methods in Ecology and Evolution* 9,  
694 88–97.
- 695 Kelling, S., Johnston, A., Bonn, A., Fink, D., Ruiz-Gutierrez, V., Bonney, R., et al. (2019). Using  
696 Semistructured Surveys to Improve Citizen Science Data for Monitoring Biodiversity.  
697 *BioScience* 69, 170–179. doi:10.1093/biosci/biz010.
- 698 Kelling, S., Johnston, A., Hochachka, W. M., Iliff, M., Fink, D., Gerbracht, J., et al. (2015). Can  
699 Observation Skills of Citizen Scientists Be Estimated Using Species Accumulation Curves?  
700 *PLoS One* 10. doi:10.1371/journal.pone.0139600.
- 701 Kepler, C. B., and Scott, J. M. (1981). Reducing bird count variability by training observers. *Studies*  
702 *in Avian Biology* 6.

- 703 Koenker, R., and Hallock, K. F. (2001). Quantile Regression. *Journal of Economic Perspectives* 15,  
704 143–156. doi:10.1257/jep.15.4.143.
- 705 Lewandowski, E., and Specht, H. (2015). Influence of volunteer and project characteristics on data  
706 quality of biological surveys. *Conservation Biology* 29, 713–723. doi:10.1111/cobi.12481.
- 707 Link, W. A., Sauer, J. R., and Niven, D. K. (2006). A hierarchical model for regional analysis of  
708 population change using Christmas Bird Count data, with application to the American Black  
709 Duck. *The Condor* 108, 13–24.
- 710 McKinley, D. C., Miller-Rushing, A. J., Ballard, H. L., Bonney, R., Brown, H., Cook-Patton, S. C., et  
711 al. (2017). Citizen science can improve conservation science, natural resource management,  
712 and environmental protection. *Biological Conservation* 208, 15–28.  
713 doi:10.1016/j.biocon.2016.05.015.
- 714 Miller-Rushing, A., Primack, R., and Bonney, R. (2012). The history of public participation in  
715 ecological research. *Frontiers in Ecology and the Environment* 10, 285–290.  
716 doi:10.1890/110278.
- 717 R Core Team (2020). *R: A language and environment for statistical computing*. R Foundation for  
718 Statistical Computing, Vienna, Austria.
- 719 Robbins, C. S., and Stallcup, R. W. (1981). Problems in separating species with similar habits and  
720 vocalizations.
- 721 Robinson, W. D., and Curtis, J. R. (2020). Creating benchmark measurements of tropical forest bird  
722 communities in large plots. *Condor* 122. doi:10.1093/condor/duaa015.
- 723 Robinson, W. D., Lees, A. C., and Blake, J. G. (2018). Surveying tropical birds is much harder than  
724 you think: a primer of best practices. *Biotropica* 50, 846–849. doi:10.1111/btp.12608.
- 725 Schuetz, J. G., and Johnston, A. (2019). Characterizing the cultural niches of North American birds.  
726 *Proc Natl Acad Sci USA* 116, 10868–10873. doi:10.1073/pnas.1820670116.
- 727 Sullivan, B. L., Wood, C. L., Iliff, M. J., Bonney, R. E., Fink, D., and Kelling, S. (2009). eBird: A  
728 citizen-based bird observation network in the biological sciences. *Biological Conservation*  
729 142, 2282–2292. doi:10.1016/j.biocon.2009.05.006.
- 730 Walker, J., and Taylor, P. (2017). Using eBird data to model population change of migratory bird  
731 species. *Avian Conservation and Ecology* 12. doi:10.5751/ACE-00960-120104.
- 732 West, M. J. (1999). Stereological methods for estimating the total number of neurons and synapses:  
733 issues of precision and bias. *Trends in Neurosciences* 22, 51–61. doi:10.1016/S0166-  
734 2236(98)01362-9.
- 735 Wood, C., Sullivan, B., Iliff, M., Fink, D., and Kelling, S. (2011). eBird: Engaging Birders in Science  
736 and Conservation. *PLoS Biol* 9. doi:10.1371/journal.pbio.1001220.



737 Young, B. E., Dodge, N., Hunt, P. D., Ormes, M., Schlesinger, M. D., and Shaw, H. Y. (2019). Using  
738 citizen science data to support conservation in environmental regulatory contexts. *Biological*  
739 *Conservation* 237, 57–62. doi:10.1016/j.biocon.2019.06.016.

740 Yu, J., Wong, W.-K., and Hutchinson, R. A. (2010). Modeling Experts and Novices in Citizen  
741 Science Data for Species Distribution Modeling. in *2010 IEEE International Conference on*  
742 *Data Mining*, 1157–1162. doi:10.1109/ICDM.2010.103.

743

744

745

746

747

748 Tables.

749

750 Table 1. Twenty species were included in the study. Scientific names, sequence, and short-hand  
751 codes follow American Ornithological Society (<http://checklist.aou.org/taxa>). See text for definitions  
752 of dabbler versus diver and dispersed versus aggregated foragers. Plumage sexual dichromatism was  
753 scored based on the period of year in which the species is most numerous at the study site: weak or  
754 no dichromatism (0) and moderate to strong dichromatism (1).

755

| <b>English name</b>      | <b>Scientific name</b>    | <b>Code</b> | <b>Dabbler (0) or Diver (1)</b> | <b>Dispersed (0) or aggregated (1)</b> | <b>Plumage dichromatism</b> |
|--------------------------|---------------------------|-------------|---------------------------------|----------------------------------------|-----------------------------|
| <b>Wood Duck</b>         | <i>Aix sponsa</i>         | wodu        | 0                               | 0                                      | 1                           |
| <b>Cinnamon Teal</b>     | <i>Spatula cyanoptera</i> | cite        | 0                               | 0                                      | 0                           |
| <b>Northern Shoveler</b> | <i>Spatula clypeata</i>   | nsho        | 0                               | 1                                      | 1                           |
| <b>Gadwall</b>           | <i>Mareca strepera</i>    | gadw        | 0                               | 0                                      | 1                           |
| <b>American Wigeon</b>   | <i>Mareca americana</i>   | amwi        | 0                               | 1                                      | 1                           |
| <b>Mallard</b>           | <i>Anas platyrhynchos</i> | mall        | 0                               | 0                                      | 1                           |
| <b>Northern Pintail</b>  | <i>Anas acuta</i>         | nopi        | 0                               | 0                                      | 1                           |
| <b>Green-winged Teal</b> | <i>Anas crecca</i>        | gwte        | 0                               | 1                                      | 1                           |
| <b>Canvasback</b>        | <i>Aythya valisineria</i> | canv        | 1                               | 0                                      | 1                           |

|                          |                                |      |   |   |   |
|--------------------------|--------------------------------|------|---|---|---|
| <b>Ring-necked Duck</b>  | <i>Aythya collaris</i>         | rndu | 1 | 1 | 1 |
| <b>Lesser Scaup</b>      | <i>Aythya affinis</i>          | lesc | 1 | 0 | 1 |
| <b>Surf Scoter</b>       | <i>Melanitta perspicillata</i> | susc | 1 | 0 | 0 |
| <b>Bufflehead</b>        | <i>Bucephala albeola</i>       | buff | 1 | 0 | 1 |
| <b>Hooded Merganser</b>  | <i>Lophodytes cucullatus</i>   | home | 1 | 0 | 0 |
| <b>Ruddy Duck</b>        | <i>Oxyura jamaicensis</i>      | rudu | 1 | 1 | 0 |
| <b>Pied-billed Grebe</b> | <i>Podilymbus podiceps</i>     | pbgr | 1 | 0 | 0 |
| <b>Eared Grebe</b>       | <i>Podiceps nigricollis</i>    | eagr | 1 | 0 | 0 |
| <b>American Coot</b>     | <i>Fulica americana</i>        | amco | 0 | 1 | 0 |
| <b>Ring-billed Gull</b>  | <i>Larus delawarensis</i>      | rbgu | 0 | 0 | 0 |
| <b>California Gull</b>   | <i>Larus californicus</i>      | cagu | 0 | 0 | 0 |

756

757

758

759

760

761

762

763

764

765 Table 2. Model results of variables most influential on percent error.  $R^2$  is the quadratic of the daily  
766 reference (benchmark) count; percent richness is the fraction of the waterbird species present each  
767 day that were included on each eBird checklist; duration was the length (minutes) of eBird checklist  
768 observation period; starttime was time of day each checklist was initiated; dichromatic was whether  
769 each waterbird species exhibited plumage dichromatism or not; date2 was the quadratic of day of  
770 year; and proRichness was the total species detected by WDR on each date. See supplemental  
771 materials for the full model results.

772

|                                         | <b>df</b> | <b>Log likelihood</b> | <b>BIC</b> | <b>delta</b> | <b>weight</b> |
|-----------------------------------------|-----------|-----------------------|------------|--------------|---------------|
| <b>R*2_Percent Richness</b>             | 7         | -9751.3               | 19565.0    | 0            | 0.696         |
| <b>R*2_Percent Richness_duration</b>    | 8         | -9749.0               | 19569.4    | 4.44         | 0.075         |
| <b>R*2_Percent Richness_starttime</b>   | 8         | -9749.2               | 19570.1    | 4.72         | 0.066         |
| <b>R*2_Percent Richness_dichromatic</b> | 8         | -9749.4               | 19570.4    | 5.19         | 0.052         |
| <b>R*2_Percent Richness_date2</b>       | 9         | -9745.0               | 19572.7    | 5.41         | 0.047         |
| <b>R*2_Percent Richness_proRichness</b> | 8         | -9750.7               | 19573.0    | 7.79         | 0.014         |

773

774

775

776 Supplemental Table 1. Species-specific measurements of central tendency and variation in percent  
777 counting errors. A) excluding species non-detections from checklists; B) including species non-  
778 detections (zero counts) in checklists.

779

780

781 Supplemental Table 2. Species-specific BIC model results. Full model results are presented for each  
782 species alphabetically.

783

784 Supplemental Table 3. Full mixed-effects model results supplementing the abbreviated results  
785 presented in Table 2.

786



787

788 Figures.

789

790 A

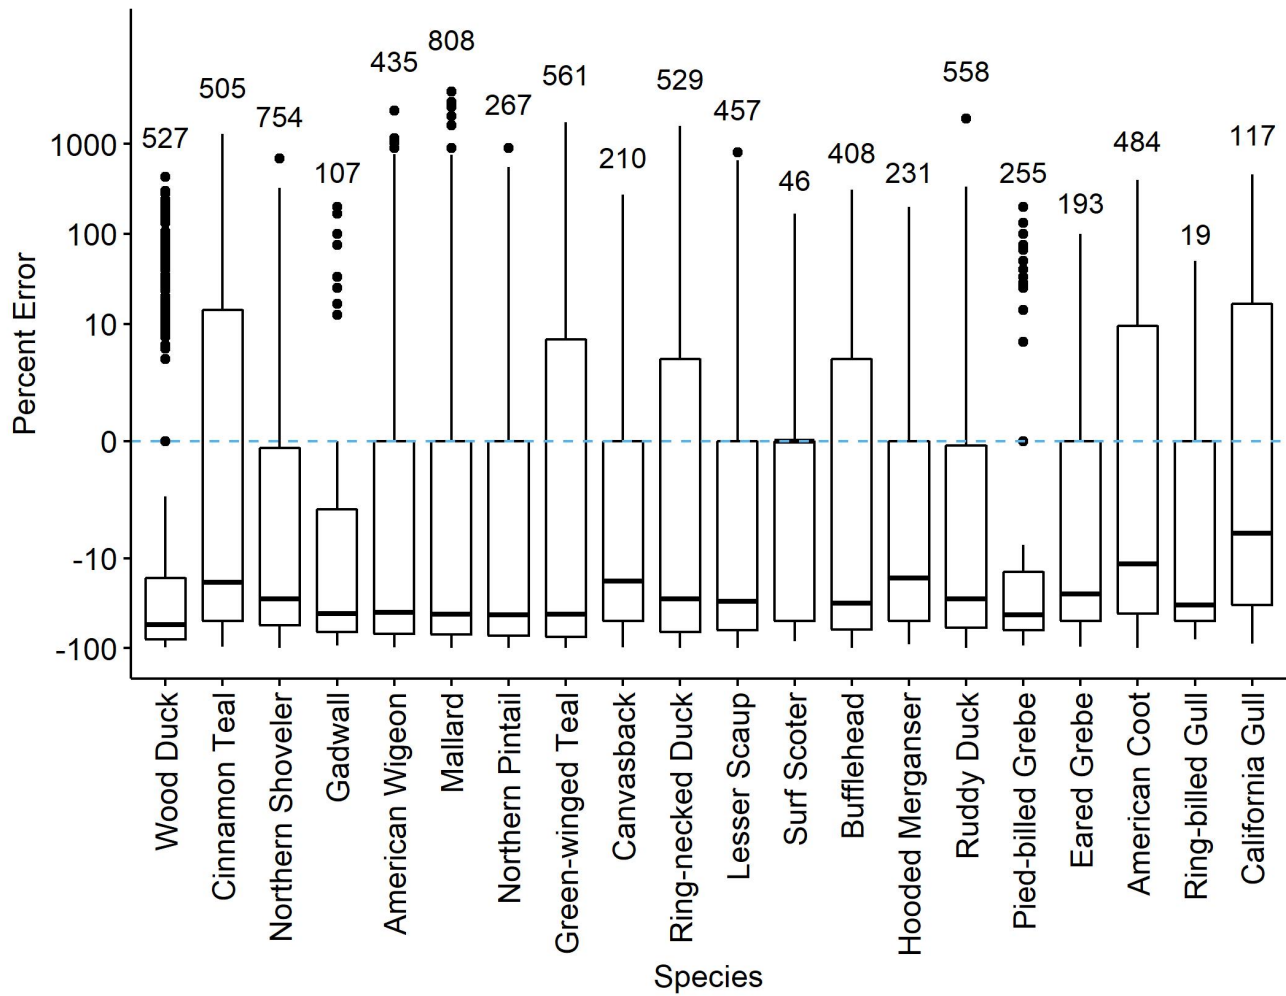

791

792

793

794

795

796

797

798

799

800 B

801

802

803

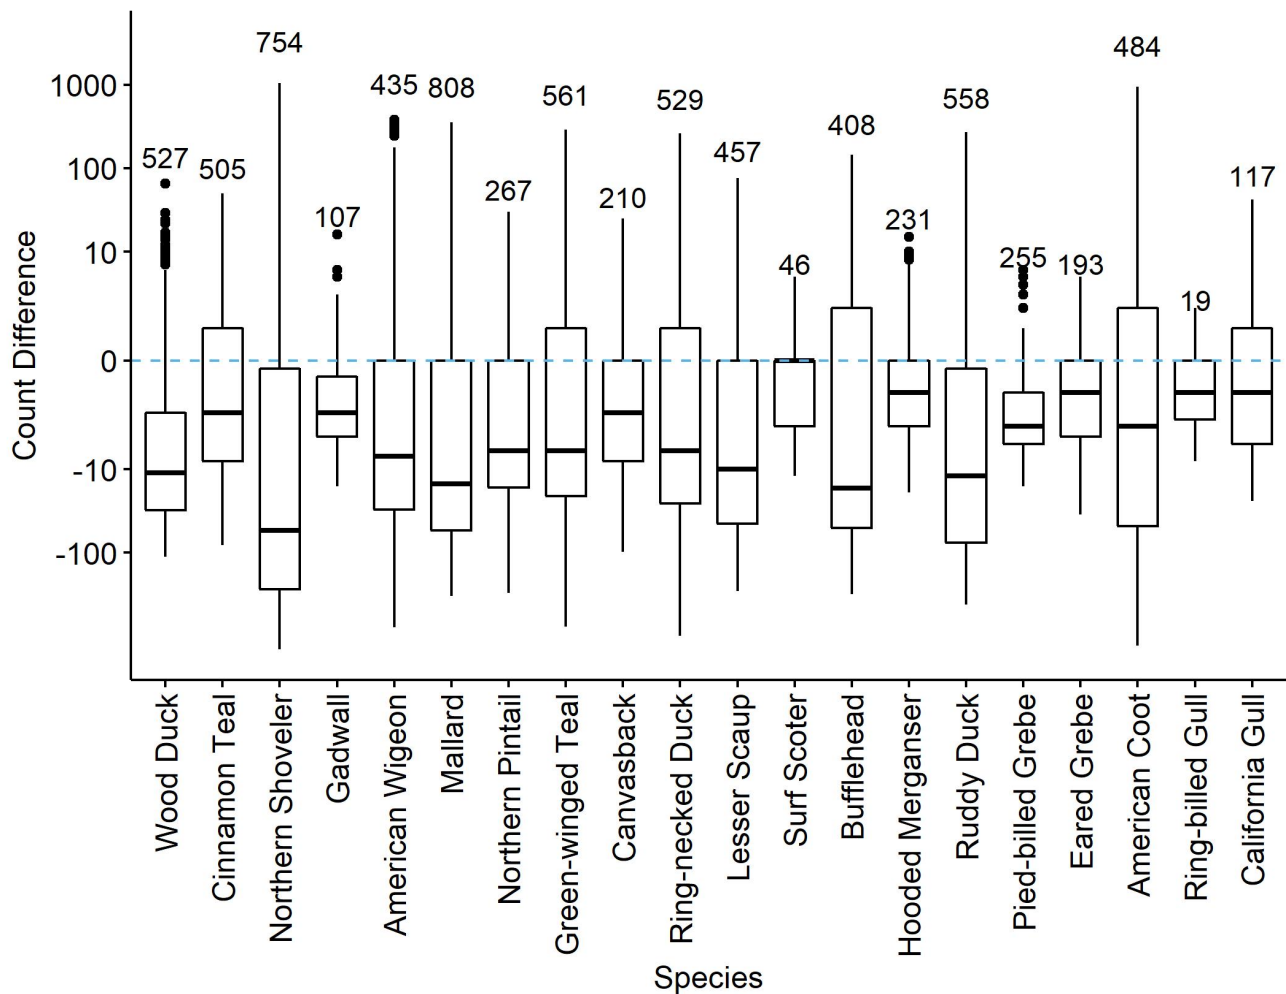

804

805 Figure 1. Percent error (A) and count differences (B) in counts of 20 waterbird species reported on  
806 eBird checklists at the Philomath Ponds, Oregon USA, 2010-2019. Medians, quantile plots and  
807 outliers are indicated, as well as number of checklists reporting counts of each species. Only  
808 checklists reporting counts greater than zero were included. For checklists including counts of zero  
809 on dates when  $R^*$  counts were non-zero, see Supplemental Figure 2.

810

811

812

813 A

814

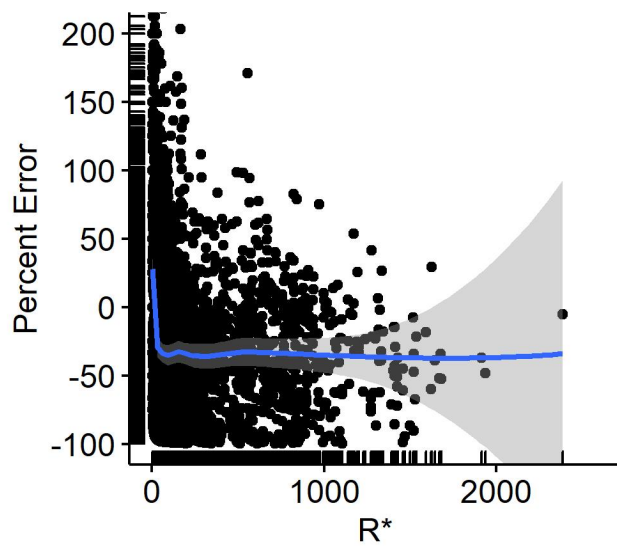

815

816 B

817

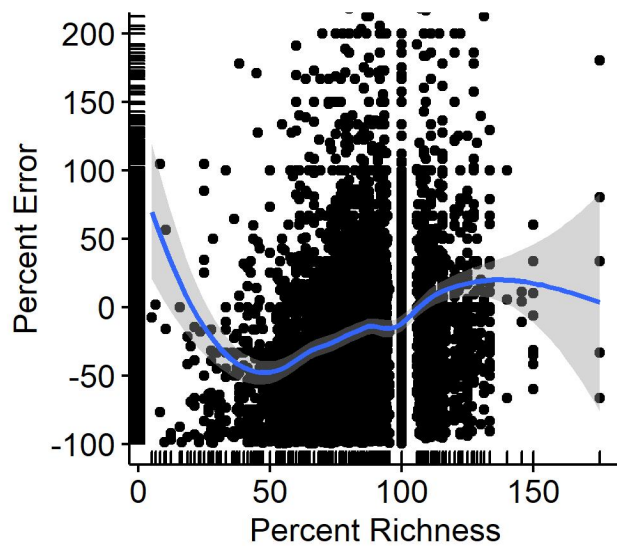

818

819 Figure 2. BIC-model predicted percent error in eBird waterbird counts as a function of A) reference  
820 (benchmark) counts ( $R^*$ ), and B) percent richness of waterbird species detected at Philomath ponds.

821

822

823

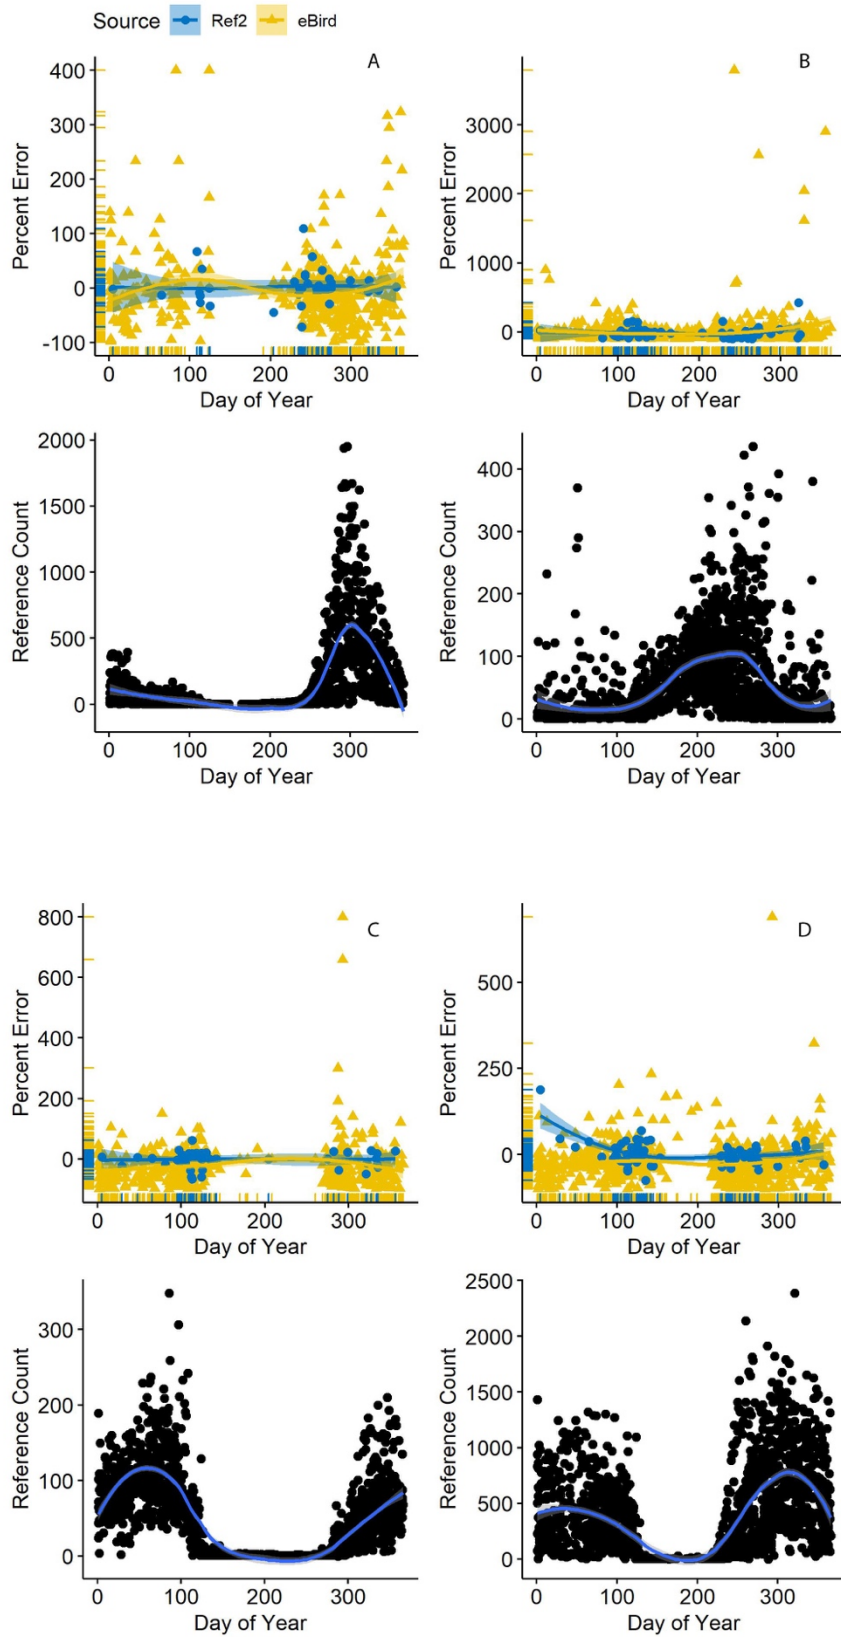

825 Figure 3. Variation in reference (benchmark) counts ( $R^*$ ) as a function of date (lower panel) and  
826 counts reported in eBird (gold triangles in upper panel) alongside second-visit counts (Ref2; blue  
827 circles) at Philomath ponds, Oregon USA, 2010-2019. Counts in the upper panels are indicated with  
828 respect to the  $R^*$  count (zero line) each day. Loess regression lines with 95% confidence intervals are  
829 included. A) American Coot; B) Mallard; C) Lesser Scaup; D) Northern Shoveler.

830

831

832 A

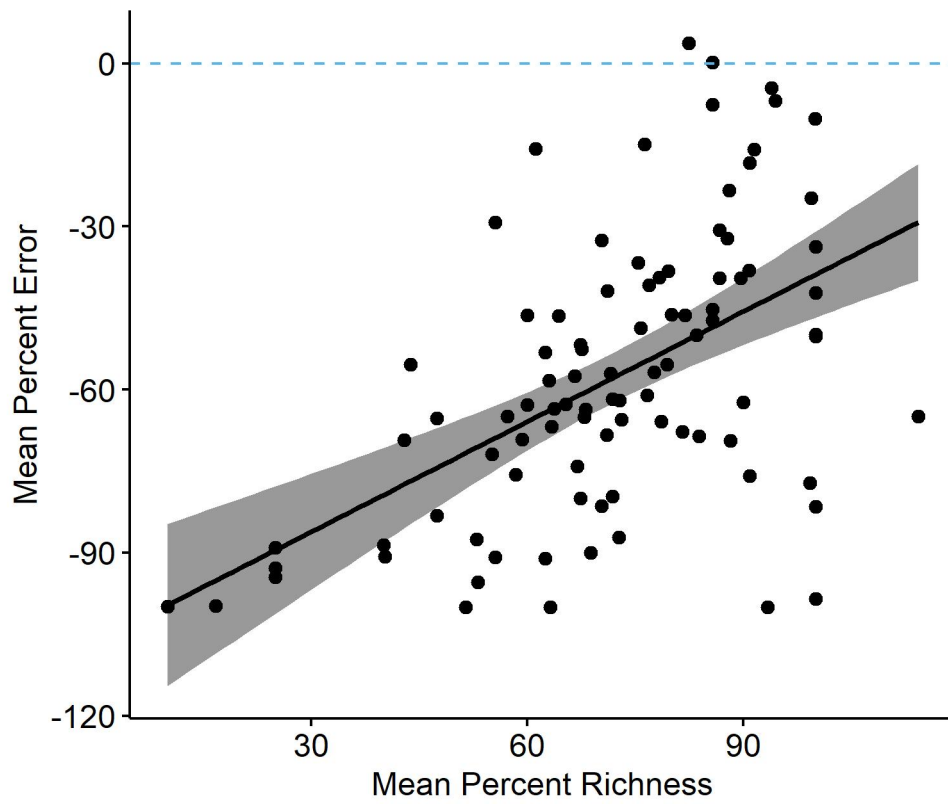

833

834 B

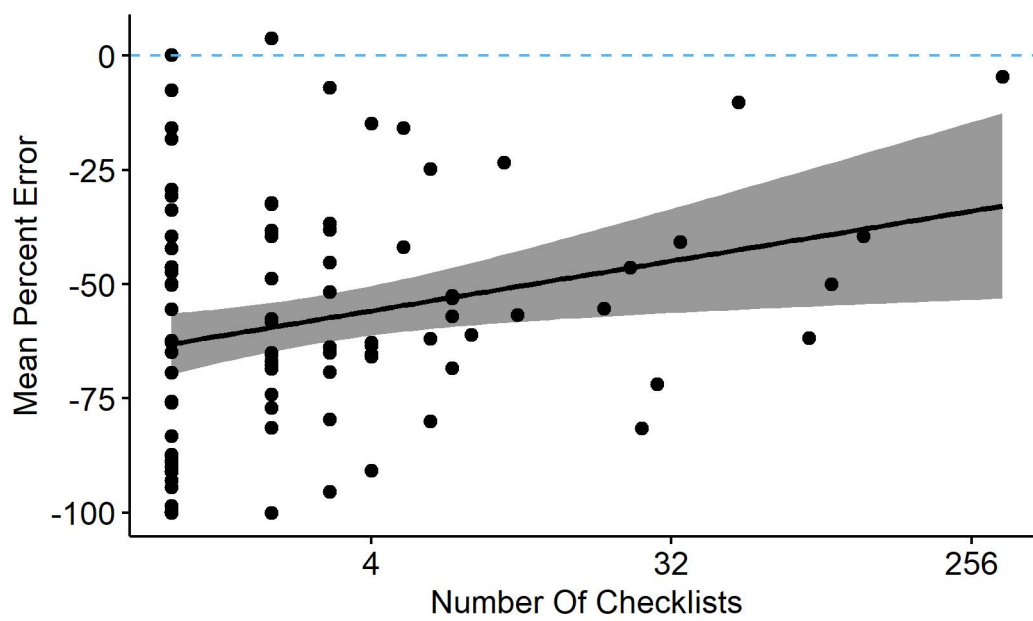

835

836



837

838 Figure 4. A) Observers reporting a greater percentage of waterbird species present at Philomath  
839 ponds, Oregon USA, tended to have lower percent counting errors in their eBird checklists (linear  
840 regression and 95% confidence intervals;  $y = -110 + 0.68x$ ). B) Observers submitting more total  
841 checklists tended to have lower counting errors ( $y = -60 + 0.17x$ ). Note that these are means of all  
842 applicable checklists for each observer, so each point represents a unique observer.

843

844

845

846

847

848

849

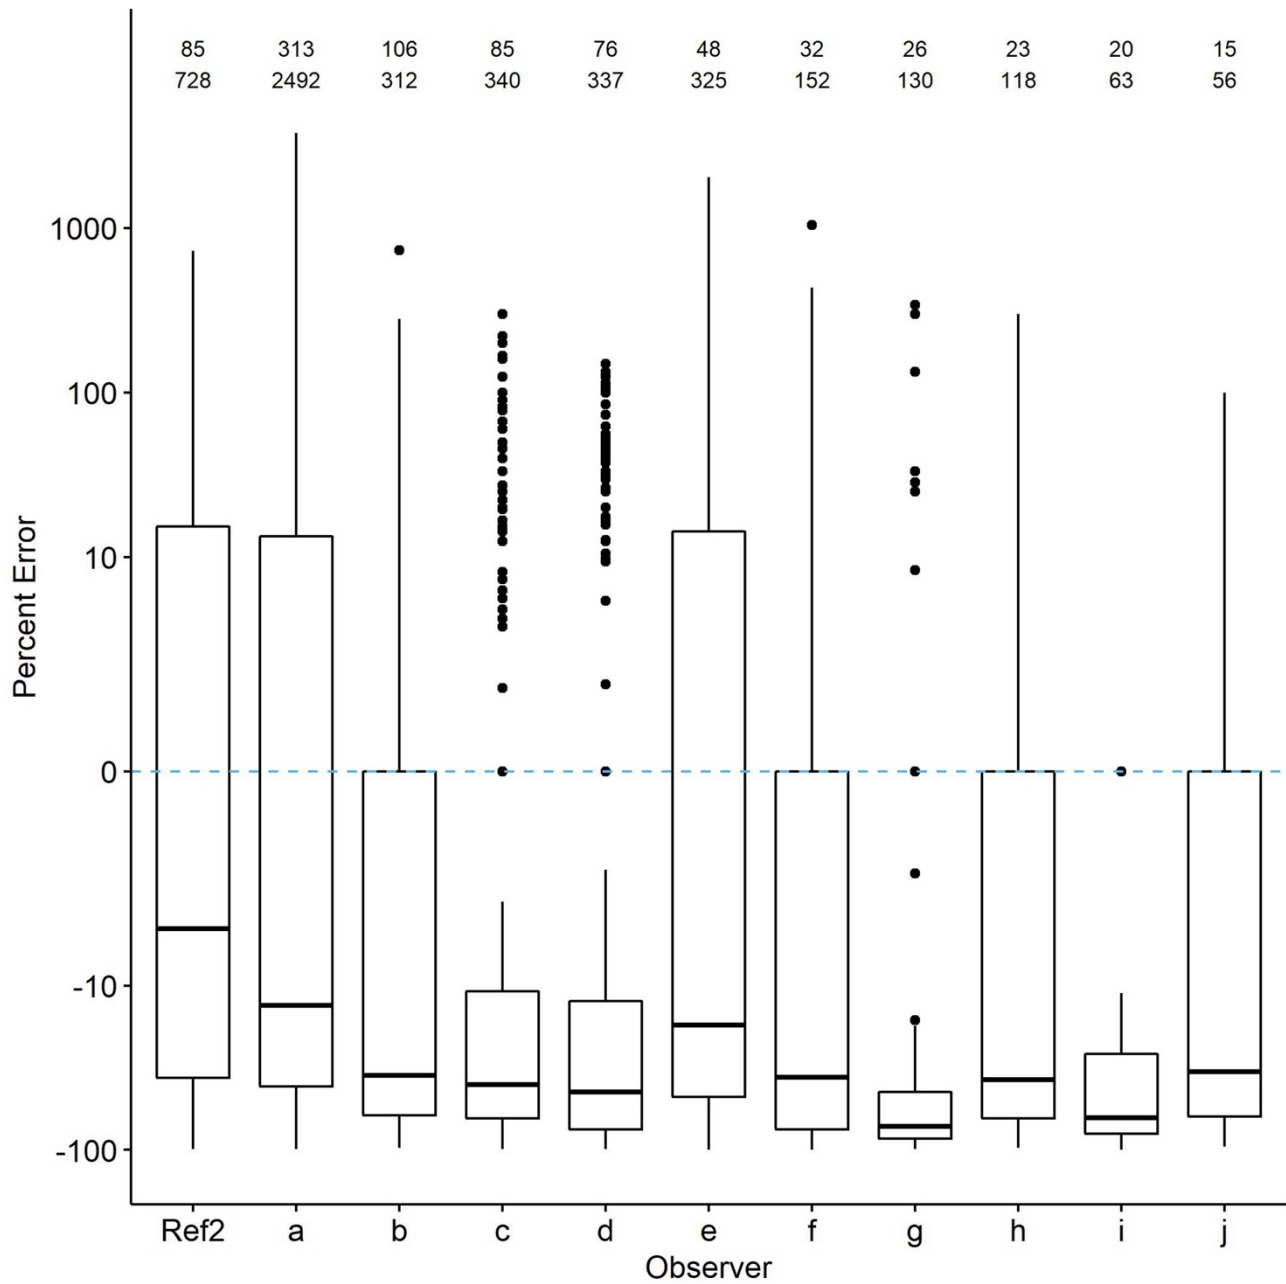

850

851 Figure 5. Comparison of percent count errors in eBird checklists contributed by the 10 observers with  
852 the most checklists (top row of numbers) and waterbird observations (second row of numbers; each  
853 checklist includes multiple species). The zero line is  $R^*$ . Ref2 is the second-visit data from WDR.  
854 Quantile plots show the median, 25<sup>th</sup> percentiles as boxes and whiskers, plus outliers. Species-  
855 specific plots are available from the authors upon request.

856

857

858

859

860 A

861

862

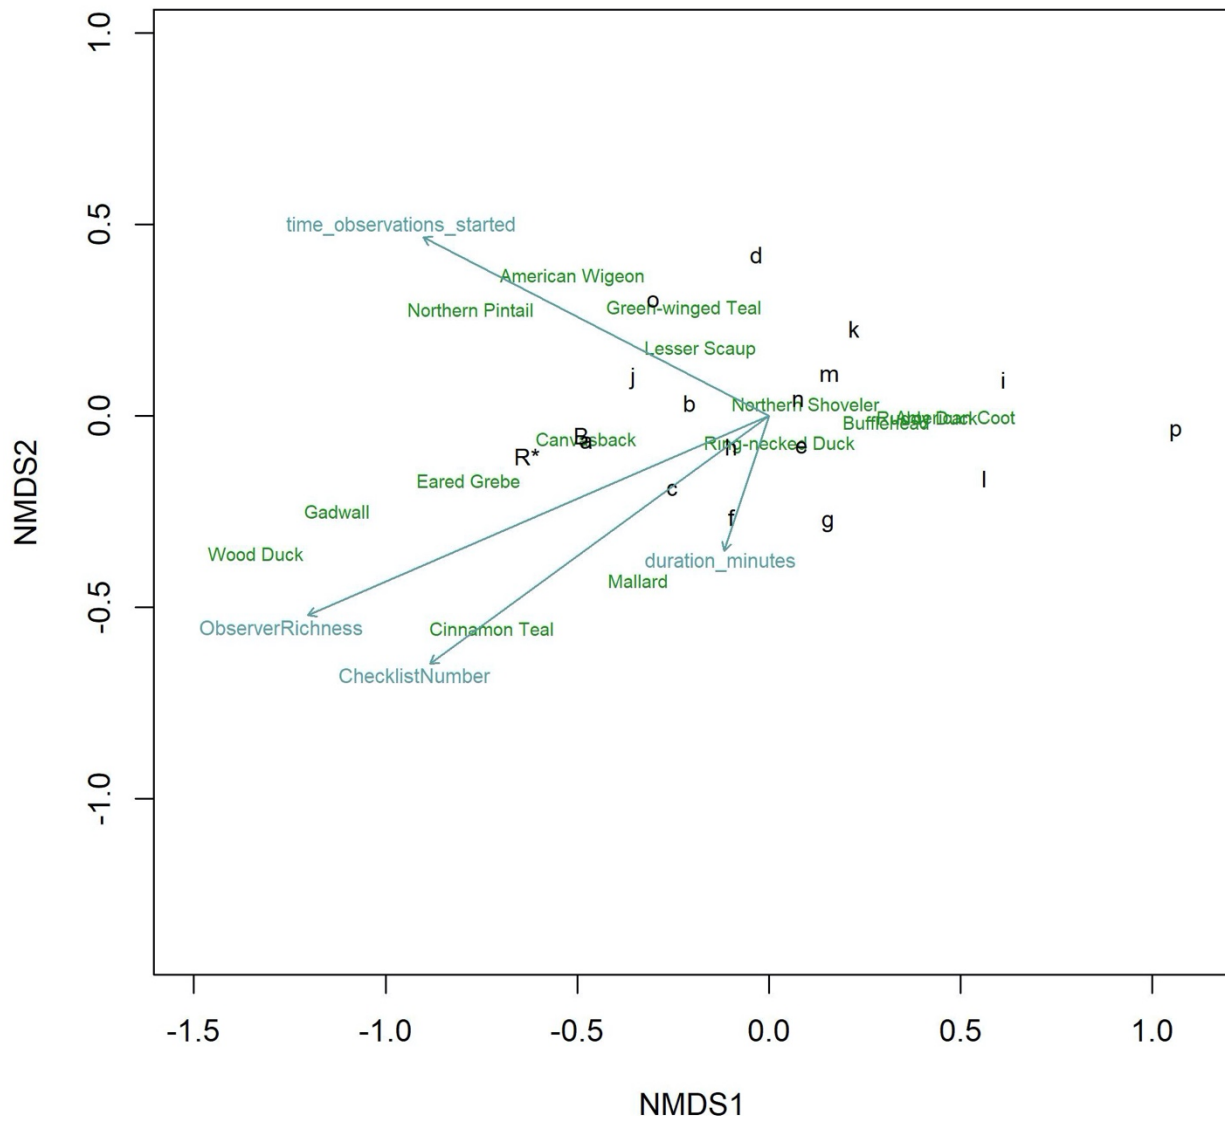

863

864

865

866

867

868 B

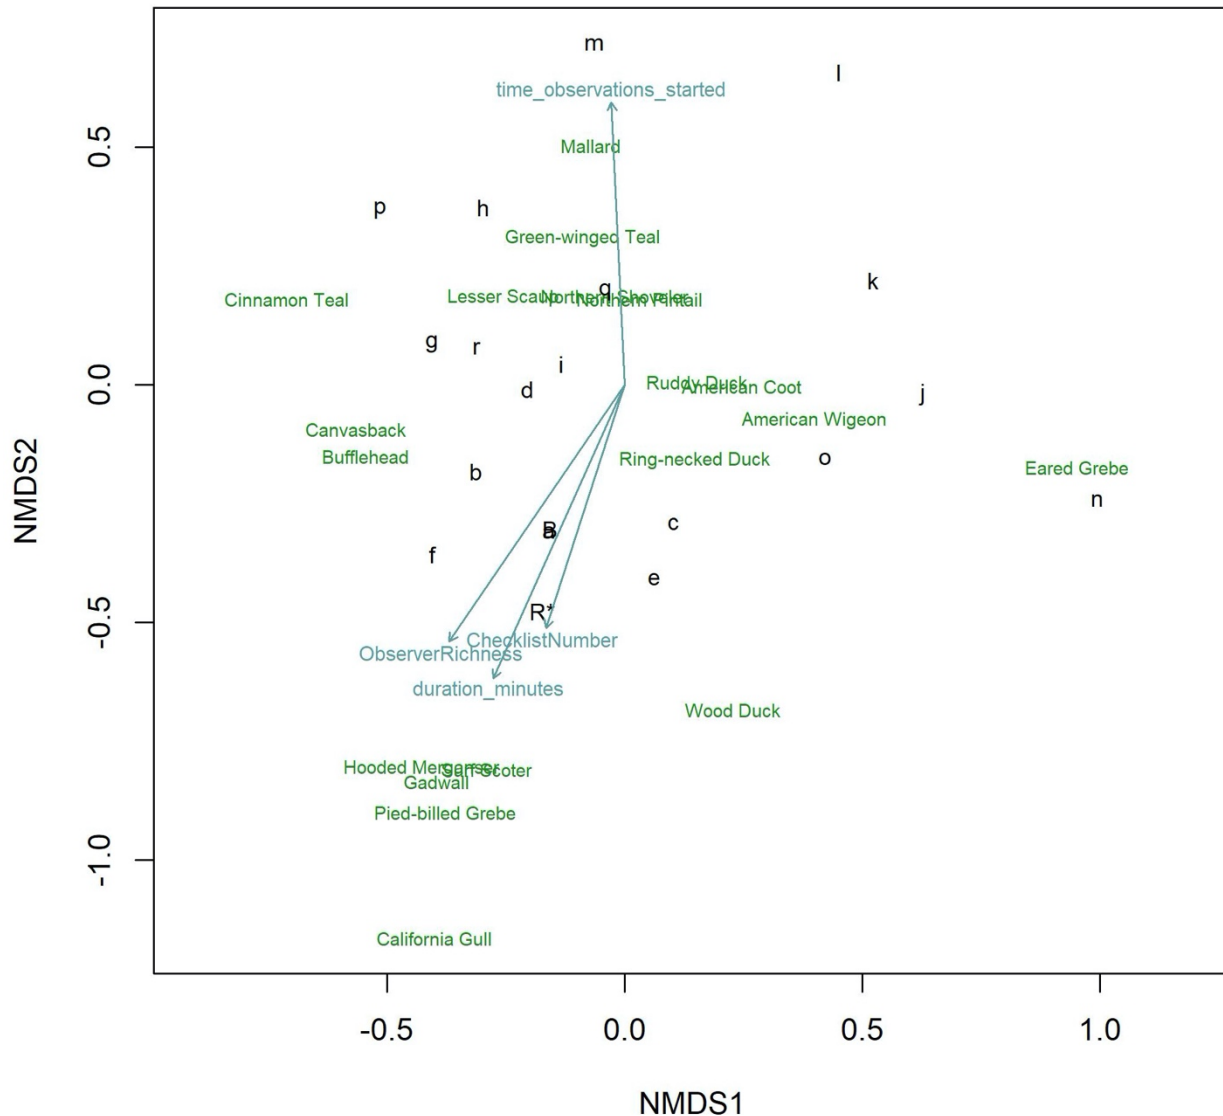

869  
 870 Figure 6. Ordinations using NMDS of eBird checklists characterization of the waterbird community  
 871 during A) January and B) October at Philomath ponds, Oregon USA, 2010-2019. The most  
 872 influential vectors included Observer Richness (percent of known richness reported on each  
 873 checklist), Checklist Number (total number of checklists per observer), observation start time each  
 874 day, and the duration of each observation period. Relative positions of species in species space are  
 875 noted by species English names. Benchmark counts are noted by  $R^*$ . Individual observers are noted  
 876 by lower case letters; those nearest to  $R^*$  produced characterizations of the waterbird community  
 877 most like  $R^*$ .  $\bar{B}$  is the collective average of eBird checklists, showing that from the perspective of  
 878 generally characterizing the community, averaging across checklists contributed by many observers  
 879 aligns more closely with  $R^*$  than do checklists from most individual observers, although observer *a*  
 880 occupies nearly the same location in species space.

881 Supplemental Figures

882

883

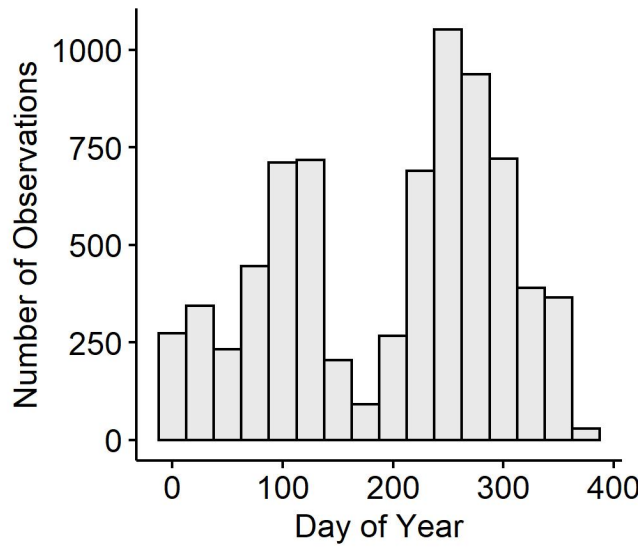

884

885 Supplemental Figure 1. Number of eBird checklists contributed for the study site at Philomath Ponds,  
886 Oregon USA, 2010-2019, as a function of day of year.

887

888

889

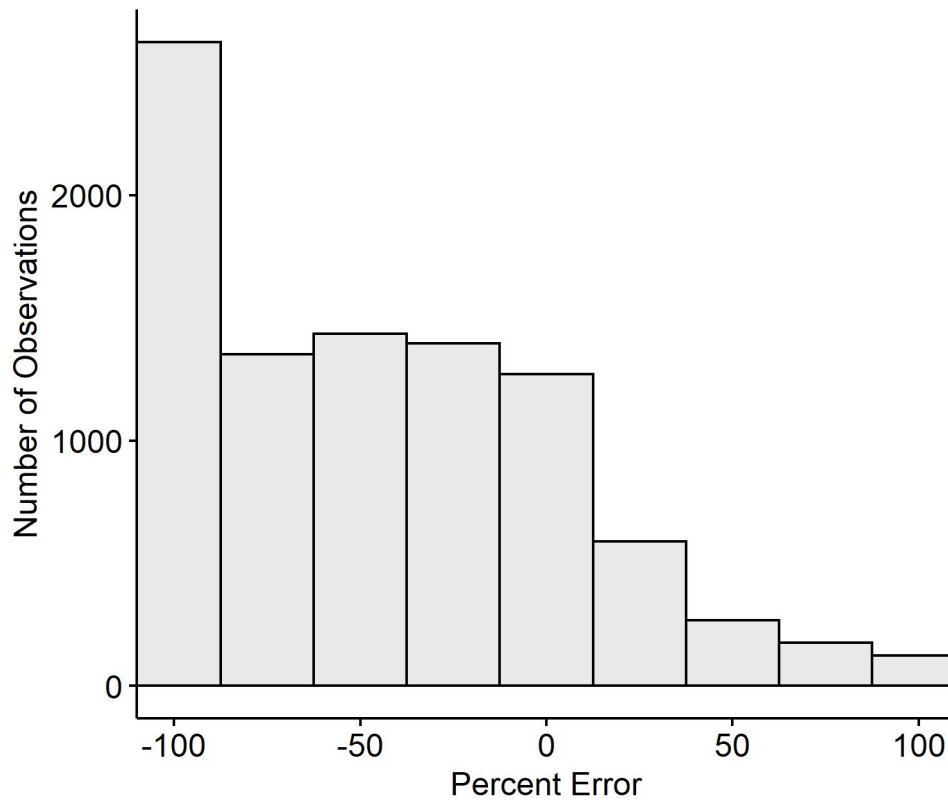

890

891 Supplemental Figure 2. Counts of waterbirds in eBird checklists included in our analyses as a  
892 function of their percent error.

893

894

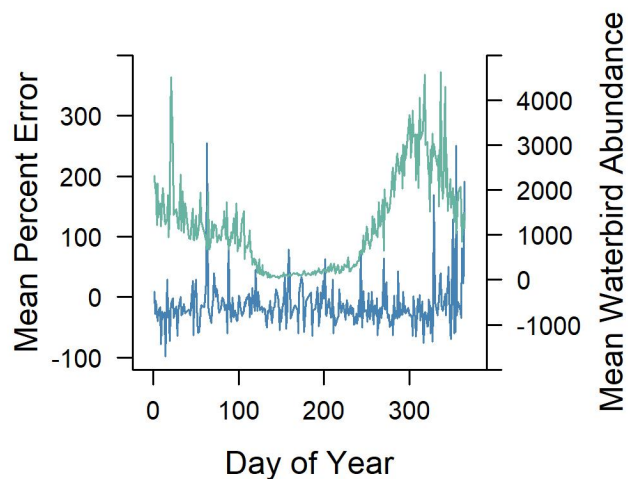

895

896 Supplemental Figure 3. Relationship between mean percent error on eBird checklists (blue line) and  
897 mean waterbird abundance (green line) as a function of day of year at Philomath ponds, Oregon  
898 USA, 2010-2019. Waterbird abundance is the mean of all the counts ( $R^*$ ) of all of the possible 20  
899 study species present each day across the 10 years.



900

901
